# Supplementary material
Source: publisher figshare collection journal article supplement (https://sage.figshare.com/ndownloader/files/39664624)
Supplement: Supplementary file 1 [file 39664624]

Supplementary Table 1. Outcome Variables Across Pain Trials and Study Conditions

| Variable Time | | Overall sample  (*N*= 140) | Neutral group  (*n*= 42) | Physical-validated group (*n*= 48) | Emotion-validated group (*n*= 50) |
| --- | --- | --- | --- | --- | --- |
|
| Pain tolerance (s) | Time 1 | 61.61 (70.78) | 62.45 (71.70) | 66.48 (75.49) | 56.22 (66.27) |
|  | Time 2 | 66.26 (75.19) | 65.40 (66.72) | 70.08 (81.01) | 63.32 (77.43) |
| Pain unpleasantness | Time 1 | 6.52 (1.81) | 6.48 (1.86) | 6.73 (1.53) | 6.36 (2.01) |
|  | Time 2 | 6.85 (2.15) | 6.71 (2.18) | 7.04 (2.03) | 6.78 (2.25) |
| Pain intensity | Time 1 | 6.19 (2.04) | 6.17 (1.97) | 6.04 (1.96) | 6.36 (2.18) |
|  | Time 2 | 6.69 (2.03) | 6.40 (2.01) | 6.90 (1.77) | 6.72 (2.29) |
| Worry | Time 1 | 3.06 (2.62) | 2.90 (2.36) | 3.25 (2.72) | 3.00 (2.78) |
|  | Time 2 | 3.09 (2.53) | 3.07 (2.43) | 3.19 (2.54) | 3.02 (2.65) |
| Concern | Time 1 | 2.87 (2.66) | 2.67 (2.42) | 3.10 (2.87) | 2.82 (2.68) |
|  | Time 2 | 3.14 (2.80) | 3.14 (2.64) | 3.58 (2.78) | 2.72 (2.96) |
| PTPQ |  | 11.68 (8.65) | 10.86 (8.18) | 11.44 (9.15) | 12.60 (8.62) |

*Note.* PTPQ = Perceived Threat of Pain Questionnaire. Possible range for pain unpleasantness, pain intensity, worry, and concern was 0-10. The summed score from the 4-item PTPQ is represented. Pain tolerance measures are shown in seconds. Maximum allowed time for immersion during the CPT was 240 seconds.
